# Supplementary material for: Cohort profile: COpenhagen ROsacea COhort (COROCO) and COpenhagen MIgraine COhort (COMICO)
Source: PubMed Central journal article supplement — BMJ Open. 2020 Aug 20;10(8):e039445. doi: 10.1136/bmjopen-2020-039445 (PMC7440817; doi:10.1136/bmjopen-2020-039445), 2020-08-20
Supplement: bmjopen-2020-039445supp001.pdf [file bmjopen-2020-039445supp001.pdf]

**Appendix 1.** Semi-structured interview developed at the department of Dermatology in Gentofte, Denmark by authors NW, JT and AE. The purpose of the interviews is to uncover rosacea features, previous treatments for rosacea, and comorbidities in the patient and in 1<sup>st</sup> and 2<sup>nd</sup> degree relatives. The interview also includes sleeping habits, smoking, alcohol, BMI, dermatology life quality index (DLQI) and rosacea clinical scorecard.

## 1. Rosacea

1.1 Has a doctor ever told you that you have rosacea? (one answer)

- No – and I do not have rosacea
- Yes, I am certain I have rosacea, but a doctor has never told me.
- Yes – a doctor who is not a dermatologist (e.g. GP)
- Yes – a dermatologist

**If yes to one of the above, go to question. 1.2. If no, move on to question 3**

1.2 Which symptom(s) of rosacea did you first notice? (multiple answers)

- Redness of particularly cheeks and/or the chest, which did not want to go away
- Flushing attacks (sudden warmth/burning sensations and redness which lasts a few minutes – half an hour)
- Persistent (> 1 hour) attacks of flushing
- Telangiectasias in the face (cheeks, nose, chin or eyelids)
- Symptoms from the eyes
- Recurrent formation of pimples in the face
- Change of the nose's look or size
- Other? \_\_\_\_\_

1.2.1 At what age did you experience the first symptom(s) of rosacea? Age   years

1.2.2 How much time passed from your first symptom(s) of rosacea until a doctor diagnosed you with rosacea?

Year   Months

1.3 Has any of the following symptoms appeared started appearing since you noticed the first symptom(s) of rosacea? (multiple answers)

- Redness of particularly cheeks and/or the chest, which did not want to go away
- Flushing attacks (sudden warmth/burning sensations and redness which lasts a few minutes – half an hour)
- Persistent (> 1 hour) attacks of flushing
- Telangiectasias in the face (cheeks, nose, chin or eyelids)
- Symptoms from the eyes
- Recurrent formation of pimples in the face
- Change of the nose's look or size
- Other? \_\_\_\_\_

1.4 Do you still have symptoms of Rosacea? (one answer)

- No
- Improvement
- Worsening
- Unchanged symptoms

Describe:

## 2. ROSACEA TREATMENTS

---

2.1 Have you ever been treatment for rosacea? (one answer)

- No, never (move on to question 3)
- Yes, but I am no longer in treatment
- Yes, I still receive treatment

2.2 How long did/have you receive(d) treatment for rosacea? (cumulated time)

- Less than 3 months
- 3 months – 1 year
- More than 1 year – how long (years) \_\_\_\_\_

2.3 If no longer in treatment for rosacea – why did you stop treatment? (one answer)

- My symptoms improved / disappeared after treatment
- There was no effect of the treatment on my symptoms
- My symptoms worsened due to treatment
- I got side effects from the treatment
- I do not wish to be on daily medication

2.4 Which type of treatment(s) have you received? (multiple answers)

- Creme/gel/ointment
- Pills
- Laser treatment

2.5 Which drug(s) have you tried, and did it/they have any effect? (multiple answers)

|                                                                              | Yes                      | No                       | Do not know              |
|------------------------------------------------------------------------------|--------------------------|--------------------------|--------------------------|
| <input type="checkbox"/> Mirvaso (brimonidine tartrate) creme/gel            | <input type="checkbox"/> | <input type="checkbox"/> | <input type="checkbox"/> |
| <input type="checkbox"/> Finacea (azelaic acid) creme/gel                    | <input type="checkbox"/> | <input type="checkbox"/> | <input type="checkbox"/> |
| <input type="checkbox"/> Metronidazole / metrocrem / rozex / robaz creme/gel | <input type="checkbox"/> | <input type="checkbox"/> | <input type="checkbox"/> |
| <input type="checkbox"/> Oracea (doxycycline) tablet                         | <input type="checkbox"/> | <input type="checkbox"/> | <input type="checkbox"/> |
| <input type="checkbox"/> Soolantra (ivermectin) creme                        | <input type="checkbox"/> | <input type="checkbox"/> | <input type="checkbox"/> |
| <input type="checkbox"/> Tetracycline                                        | <input type="checkbox"/> | <input type="checkbox"/> | <input type="checkbox"/> |
| <input type="checkbox"/> Erythromycin (macrolide) tablet                     | <input type="checkbox"/> | <input type="checkbox"/> | <input type="checkbox"/> |
| <input type="checkbox"/> Accutin / Isotretinoin tablet                       | <input type="checkbox"/> | <input type="checkbox"/> | <input type="checkbox"/> |
| <input type="checkbox"/> Other: _____                                        | <input type="checkbox"/> | <input type="checkbox"/> | <input type="checkbox"/> |

2.6 Which symptom(s) did the treatment influence? (multiple answers)

- Papules and pustules (impurities/pimples)
- Unwanted redness of the face
- Telangiectasias in the face
- Eye symptoms
- Nose Changes
- Other: \_\_\_\_\_

Other comments to treatment:

## 3. FLUSHING + OTHER SYMPTOMS

**REDNESS/SENSITIVE SKIN**

- 3.1 Are any areas of your face often pink or red?  No  Yes
- 3.2 Is your face often pink or red compared with other people?  No  Yes
- 3.3 Is your face often pink or red compared to other body areas (e.g. abdomen, upper arms)  No  Yes
- 3.4 Have others previously mentioned that your face was pink or red?  No  Yes
- 3.5 Do you experience that coldness, heat or direct sunlight can provoke a facial burning/stinging sensation after only short exposure?  
 No  Rarely  In periods (e.g. winter)  Monthly  Weekly  Daily
- 3.6 Do you experience dry/scaly skin in central areas of your face, e.g. where you usually experience redness?  
 No  Rarely  In periods (e.g. winter)  Monthly  Weekly  Daily
- 3.7 Is your skin sensitive, i.e. blushes easily and/or gets tight/dry easily?  
 No  Rarely  In periods (e.g. winter)  Monthly  Weekly  Daily

**TELANGIECTASIAS**

- 3.8 Do you have telangiectasias in the face (e.g. around the nose or center of the cheeks)?  No  Yes
- 3.8.1 If yes, where are the telangiectasias located?  
 on top of the nose  sides of the nose  cheeks  chin  eyelids  other: \_\_\_\_\_

**FLUSHING**

- 3.9 Have you experienced flushing in the *past year*?  
 No, not at all  Yes, a few times (less than 12 times)  Yes, periodically  Monthly  Weekly  Daily
- 3.9.1 In your experience, was the start of flushing related to something?  
 no  menopause (hot flushes)  high/low metabolism  medication  other \_\_\_\_\_
- 3.9.2 If yes to flushing, in which areas of the skin do you experience flushing?  
 forehead  center of the cheeks  nose  ears  chin  neck  chest
- 3.9.3 How long does a (severe) flushing last? (describe any other symptoms)  
 \_\_\_\_\_
- 3.10 As a *child or teenager*, did you experience that your face would easily become red (e.g. when you were nervous/shy or exercised)  
 No, never  
 Yes, I have experienced it a couple of times (few times a year or less)  
 It happened occasionally/frequently  
 I would always blush when I got embarrassed  
 I experienced it daily and sometimes without a trigger
- 3.10.1 How old were you the first time you experienced flushing? Age   years

3.11 Can any of the following give you a sudden sensation of warmth (flushing) (multiple answers)

No Yes

- Alcohol  
  Hot food or drinks  
  Spicy food  
  Sunlight  
  Hot and humid surrounds e.g. sauna or hot bath etc.  
  Physical activity (e.g. sport)  
  Psychological stress or emotional revolt (e.g. holding a speech in front of a large audience)  
  Other: \_\_\_\_\_  
  None of the above

3.12 **Do you experience having thickened skin on your nose**  Yes  No

#### 4. ACNE

---

4.1 Have you experienced frequently having impure skin/pimples in the face after becoming an adult (above 25 years of age)

- No (Go to question 5)  
 No, but I had acne when I was younger  
 Yes, I have previously experienced pimples, which occurred after I became an adult, but I do not anymore  
 Yes, and I still frequently experience having pimples

4.2 If yes, do they occur in relation to anything special?

- No  Periods  Alcohol  Other \_\_\_\_\_

4.3 Where are these impurities/pimples typically located when you have them? (multiple answers)

- Forehead  Cheeks  Nose  Chin  Chest  Back  Shoulders  Other \_\_\_\_\_

#### 5. EYE SYMPTOMS

---

5.1 Do you **frequently** experience

No Yes

- red/bloodshot eyes  
  watery/runny eyes  
  foreign body sensation of the eyes  
  stinging sensation in eye/eyes  
  itching sensation in eye/eyes  
  small, fine scales around eyelid margins  
  thickened sensation of eyelid(s), which can be sore or red  
  feeling the need to close eyes in the evening, in air-conditioned spaces, during flights etc.

5.2 If yes to any of the above, have you ever visited an ophthalmologist due to these symptoms?  No  Yes

5.3 Have you had the need to use viscous/watery eyedrops (artificial tears) for longer/shorter periods of time?  No  Yes

#### 6. TREATMENT WITH CORTICOSTEROIDS/ADRENOCORTICAL HORMONE

---

6.1 Have you ever been treated with corticosteroids (also called adrenocortical hormone or prednisolone)?

- No, never (move on to question 7)  Yes – creme/ointment  Yes – pills  Yes – syringe

6.2 Have you ever been treated with corticosteroids/adrenocortical hormone?

- No, never  Yes, a short period of time (less than 1 month cumulated)  Yes, a longer period (1-12 months cumulated)  
 Yes, a long period (>12 months cumulated)

6.2.1 If yes, at what age were you when you were first treated with corticosteroids in the face? Age   years

## 7. OTHER DISEASES AND TREATMENT

7.1 Has a doctor ever told you or someone in your family that you/they had any of the following diseases? (Only biologically related family members, i.e. not stepsister or stepparents)

### SKIN

Rosacea

no one  me  parent(s)  sibling(s)  child(ren)  grandparent(s)  grandchild(ren)  parent(s) brother/sister(s)  niece/nephew(s)

Acne

no one  me  parent(s)  sibling(s)  child(ren)  grandparent(s)  grandchild(ren)  parent(s) brother/sister(s)  niece/nephew(s)

Seborrheic dermatitis

no one  me  parent(s)  sibling(s)  child(ren)  grandparent(s)  grandchild(ren)  parent(s) brother/sister(s)  niece/nephew(s)

Psoriasis

no one  me  parent(s)  sibling(s)  child(ren)  grandparent(s)  grandchild(ren)  parent(s) brother/sister(s)  niece/nephew(s)

Atopic dermatitis

no one  me  parent(s)  sibling(s)  child(ren)  grandparent(s)  grandchild(ren)  parent(s) brother/sister(s)  niece/nephew(s)

Non-melanoma skin cancer

no one  me  parent(s)  sibling(s)  child(ren)  grandparent(s)  grandchild(ren)  parent(s) brother/sister(s)  niece/nephew(s)

Malignant melanoma

no one  me  parent(s)  sibling(s)  child(ren)  grandparent(s)  grandchild(ren)  parent(s) brother/sister(s)  niece/nephew(s)

Urticaria (hives)

no one  me  parent(s)  sibling(s)  child(ren)  grandparent(s)  grandchild(ren)  parent(s) brother/sister(s)  niece/nephew(s)

Any other skin disorder

no one  me  parent(s)  sibling(s)  child(ren)  grandparent(s)  grandchild(ren)  parent(s) brother/sister(s)  niece/nephew(s)

Please describe: \_\_\_\_\_

### PSYCHIATRIC

Anxiety

no one  me  parent(s)  sibling(s)  child(ren)  grandparent(s)  grandchild(ren)  parent(s) brother/sister(s)  niece/nephew(s)

If 'me', have you ever been treated for anxiety?  No, never  Yes, and I am still in treatment  Yes, but I am no longer in treatment

Depression

no one  me  parent(s)  sibling(s)  child(ren)  grandparent(s)  grandchild(ren)  parent(s) brother/sister(s)  niece/nephew(s)

If 'me', have you ever been treated for depression?  No, never  Yes, and I am still in treatment  Yes, but I am no longer in treatment

Any other psychiatric disorder

no one  me  parent(s)  sibling(s)  child(ren)  grandparent(s)  grandchild(ren)  parent(s) brother/sister(s)  niece/nephew(s)

Please describe: \_\_\_\_\_

### STOMACH AND GUT

Heartburn/reflux

no one  me  parent(s)  sibling(s)  child(ren)  grandparent(s)  grandchild(ren)  parent(s) brother/sister(s)  niece/nephew(s)

Inflammatory bowel disease (Crohn's disease/Ulcerative colitis)

no one  me  parent(s)  sibling(s)  child(ren)  grandparent(s)  grandchild(ren)  parent(s) brother/sister(s)  niece/nephew(s)

Gluten intolerance/coeliac disease

no one  me  parent(s)  sibling(s)  child(ren)  grandparent(s)  grandchild(ren)  parent(s) brother/sister(s)  niece/nephew(s)

Do you frequently experience discomfort/bloating and changing bowel habits? (Irritated bowel syndrome)

No  Rarely (few times a year)  Monthly  Weekly  Daily

### OTHER DISEASES

Type 1 diabetes

no one  me  parent(s)  sibling(s)  child(ren)  grandparent(s)  grandchild(ren)  parent(s) brother/sister(s)  niece/nephew(s)

Type 2 diabetes

no one  me  parent(s)  sibling(s)  child(ren)  grandparent(s)  grandchild(ren)  parent(s) brother/sister(s)  niece/nephew(s)

Sjogren's syndrome

no one  me  parent(s)  sibling(s)  child(ren)  grandparent(s)  grandchild(ren)  parent(s) brother/sister(s)  niece/nephew(s)

Metabolic disease

no one  me  parent(s)  sibling(s)  child(ren)  grandparent(s)  grandchild(ren)  parent(s) brother/sister(s)  niece/nephew(s)

High cholesterol

no one  me  parent(s)  sibling(s)  child(ren)  grandparent(s)  grandchild(ren)  parent(s) brother/sister(s)  niece/nephew(s)

Hypertension (high blood pressure)

no one  me  parent(s)  sibling(s)  child(ren)  grandparent(s)  grandchild(ren)  parent(s) brother/sister(s)  niece/nephew(s)

If 'me', are you taking any treatment for hypertension?  No  Yes, pills, If yes, describe: \_\_\_\_\_

Raynaud's phenomenon

no one  me  parent(s)  sibling(s)  child(ren)  grandparent(s)  grandchild(ren)  parent(s) brother/sister(s)  niece/nephew(s)

**AIRWAYS**

COPD (chronic obstructive pulmonary disease)

 no one  me  parent(s)  sibling(s)  child(ren)  grandparent(s)  grandchild(ren)  parent(s) brother/sister(s)  niece/nephew(s)

Asthma

 no one  me  parent(s)  sibling(s)  child(ren)  grandparent(s)  grandchild(ren)  parent(s) brother/sister(s)  niece/nephew(s)

Hay fever

 no one  me  parent(s)  sibling(s)  child(ren)  grandparent(s)  grandchild(ren)  parent(s) brother/sister(s)  niece/nephew(s)**NEUROLOGICAL**

Parkinson's disease

 no one  me  parent(s)  sibling(s)  child(ren)  grandparent(s)  grandchild(ren)  parent(s) brother/sister(s)  niece/nephew(s)

Alzheimer's disease

 no one  me  parent(s)  sibling(s)  child(ren)  grandparent(s)  grandchild(ren)  parent(s) brother/sister(s)  niece/nephew(s)7.2 Do you often experience having cold nose and/or hands?  No  Yes, nose  Yes, hands7.3 Have you been diagnosed with/treated for any other diseases?  No  Yes, please describe: \_\_\_\_\_**8. SLEEP**

8.1 How often do you find it difficult to fall asleep?

 Once a month or less (never)  2-4 times a month  one to several times a week  daily

8.2 How often do you wake up earlier than what you intended (without being woken by an alarm or other noise)?

 Once a month or less (never).  2-4 times a month  one to several times a week  daily**9. SMOKING**

9.1 Do you smoke? (one answer)

 No, I have never smoked  No, but I have previously smoked  Yes, occasionally (less than 1 cigarette per day).  Yes, daily**ANSWERS FROM DAILY SMOKERS**

9.2 How many cigarettes do you smoke on average? (daily number of cigarettes)

Number of cigarettes   Other, describe: \_\_\_\_\_**ANSWERS FROM OCCASIONAL SMOKERS**

9.3 How many cigarettes do you smoke on average a week? (weekly number of cigarettes)

Number of cigarettes   Other, describe: \_\_\_\_\_**ANSWERS FROM OCCASIONAL AND FORMER SMOKERS**9.4 Have you previously smoked every day?  yes  no

9.5 If yes, how much did you smoke on average a day?

Number of cigarettes   Other, describe: \_\_\_\_\_9.6 When did you stop smoking daily? (which year)    **ANSWER FROM ALL SMOKERS**9.7 How old were you when you started smoking? (age in years)   years

---

## 10. ALCOHOL

---

- 10.1 Have you been drinking alcohol in the past year?       No     Yes
- 10.2 How much was your average weekly intake during the past 12 months? (Write '0' if none)   drinks per week

---

## 11. HEIGHT AND WEIGHT

---

- 11.1 What is your current height (without shoes)? \_\_\_\_\_ cm
- 11.2 What is your current weight without clothes and shoes? \_\_\_\_\_ kg

---

## 12. DERMATOLOGY LIFE QUALITY INDEX (DLQI)

---

- 12.1 Within the past week to what extent has your skin been itching, sore, hurting or stinging?  
 Extremely    Very    A bit    Not at all
- 12.2 Within the past week to what extent have you been embarrassed or shy because of your skin?  
 Extremely    Very    A bit    Not at all
- 12.3 Within the past week to what extent has your skin bothered you in terms of shopping or taking care of your house or back yard?  
 Extremely    Very    A bit    Not at all    Not relevant
- 12.4 Within the past week to what extent has your skin affected the way you dress?  
 Extremely    Very    A bit    Not at all    Not relevant
- 12.5 Within the past week to what extent has your skin affected your social activities or leisure activities?  
 Extremely    Very    A bit    Not at all    Not relevant
- 12.6 Within the past week to what extent has your skin complicated your opportunities of exercise?  
 Extremely    Very    A bit    Not at all    Not relevant
- 12.7 Within the past week has your skin prevented you from working or studying?  
 Yes                       No                       Not relevant
- If "No", within the past week has your skin been a problem for you at work or during studies?  
 Extremely               Very               A bit               Not at all
- 12.8 Within the past week to what extent has your skin caused problems in relation to your partner, close friends or relatives?  
 Extremely    Very    A bit    Not at all    Not relevant
- 12.9 Within the past week to what extent has your skin caused sexual problems?  
 Extremely    Very    A bit    Not at all    Not relevant
- 12.10 Within the past week, has treatment of your skin caused problems, e.g. by making your home messy or dirty, or by being time consuming?  
 Extremely    Very    A bit    Not at all    Not relevant
