# Supplementary material for: Cohort profile: COpenhagen ROsacea COhort (COROCO) and COpenhagen MIgraine COhort (COMICO)
Source: PubMed Central journal article supplement — BMJ Open. 2020 Aug 20;10(8):e039445. doi: 10.1136/bmjopen-2020-039445 (PMC7440817; doi:10.1136/bmjopen-2020-039445), 2020-08-20
Supplement: bmjopen-2020-039445supp002.pdf [file bmjopen-2020-039445supp002.pdf]

**Appendix 2:**

Semi-structured interview for diagnosing headache and migraine. Adapted from a validated interview from the Danish Headache Center (last updated November 18, 2012) for the purpose of interviewing patients without a diagnosis of migraine.

**Semi-Structured Migraine and Headache Interview****0. Headache****0.1 Have you been diagnosed with migraine**

Yes  No

**0.1.1 If yes, did anything happen in relation to debut of migraine?**

Yes  No

**0.1.1.1 If yes – what happened**

- Menarche  
 Head trauma / Concussion  
 Other \_\_\_\_\_

**0.1.2 If NO:****0.1.2.1 Do you experience regular headaches?****0.1.2.1.1 If yes, how often (days per month) \_\_\_\_\_****0.1.2.1.2 Is the headache related to anything in particular**

Yes  No

**0.1.2.1.3 If yes, what? \_\_\_\_\_****For all patients:****Do you ever experience headaches that are:**

|                                     | Yes                        | No                         |
|-------------------------------------|----------------------------|----------------------------|
| a. Unilateral                       | <input type="checkbox"/> 1 | <input type="checkbox"/> 2 |
| b. Pulsating                        | <input type="checkbox"/> 1 | <input type="checkbox"/> 2 |
| c. Moderate/severe intensity        | <input type="checkbox"/> 1 | <input type="checkbox"/> 2 |
| d. Aggravation by physical activity | <input type="checkbox"/> 1 | <input type="checkbox"/> 2 |
| e. Nausea                           | <input type="checkbox"/> 1 | <input type="checkbox"/> 2 |
| f. Vomiting                         | <input type="checkbox"/> 1 | <input type="checkbox"/> 2 |
| g. Photophobia                      | <input type="checkbox"/> 1 | <input type="checkbox"/> 2 |
| h. Phonophobia                      | <input type="checkbox"/> 1 | <input type="checkbox"/> 2 |
| i. Osmophobia                       | <input type="checkbox"/> 1 | <input type="checkbox"/> 2 |

**Duration of the headache without medication:**

- < ½ h  1  
 ½ - 4 h  2  
 5 h – 23 h  3  
 1 - 3 days  4  
 4 – 7 days  5  
 >7 days  6

**1. MIGRAINE WITH AURA (MA)****a. Do you have migraine with aura?**

1  2

**1.1 Visual aura**

Yes No

a. Are there visual disturbances?  1  2

b. Unilateral  1  2

c. Gradually progressing  1  2

d. Scotoma  1  2

e. Zig-zag lines (fortification)  1  2

f. Flickering  1  2

g. Preserved central vision  1  2

h. Duration of gradual development \_\_\_\_\_min

j. Duration of visual aura \_\_\_\_\_min

**1.2 Sensory aura**

Yes No

a. Are there sensory disturbances?  1  2

b. Unilateral  1  2

c. Gradually progressing  1  2

Do the sensory disturbances involve:

d. The face  1  2

e. The tongue  1  2

f. The hand  1  2

g. The arm  1  2

h. The foot  1  2

i. The leg  1  2

j. The body  1  2

k. Duration of gradual development \_\_\_\_\_min

l. Duration of visual aura \_\_\_\_\_min

**1.3 Motor aura**

Yes No

a. Are there motor disturbances?  1  2

b. Unilateral  1  2

c. Gradually progressing  1  2

Do the motor disturbances involve:

d. The face  1  2

e. The tongue  1  2

f. The hand  1  2

g. The arm  1  2

h. The foot  1  2

i. The leg  1  2

j. The body  1  2

k. Duration of gradual development \_\_\_\_\_min

l. Duration of visual aura \_\_\_\_\_min

**1.4 Aphasia/****Speech disturbances**

Yes No

a. Are there speech disturbances?  1  2

Are the speech impairments due to:

b. Problems articulating speech  1  2

c. Problems finding the right words  1  2

d. Problems understanding what people say  1  2

e. Problematic for other people to understand your speech  1  2

f. Duration of speech/aphasic disturbances \_\_\_\_\_min

**1.5 Basilar-type aura** Yes No

a. Are there basilar/occipital symptoms?  1  2

Are there:

b. Bilateral pareses/paresthesias  1  2

c. Bilateral visual symptoms  1  2

d. Dysarthria  1  2

e. Vertigo  1  2

f. Diplopia  1  2

g. Tinnitus  1  2

h. Hypacusia  1  2

i. Decreased level of consciousness  1  2

j. Ataxia  1  2

**1.6 Succession of aura symptoms**

a. If more than 1 aura type, is the succession of the auras:

Successive  1

Simultaneously  2

Not applicable (NA)  3

**1.7 Aura with headache** Yes No

a. Do you have aura with headache  1  2

b. Does the onset of the headache typically come:

Before the aura  1

After the aura  2

Simultaneously with the

aura  3

c. How long time before/after the aura \_\_\_\_\_min

**1.8 Aura without headache** Yes No

a. Do you have aura without headache  1  2

**1.9 Migraine with aura over time**

a. Age at onset \_\_\_\_\_years

b. Date of last attack \_\_\_\_\_

c. No. of attacks within last year:

0  1

1-5  2

6-12  3

13-24  4

25-36  5

>36  6

d. No. of lifetime attacks:

1  1

2-4  2

5-9  3

10-49  4

50-100  5

>100  6

**2. MIGRAINE WITHOUT AURA (MO)**

a. Do you have migraine without aura? Yes No  
 1  2

**2.1 Migraine without aura over time**

a. Age at onset \_\_\_\_\_years

b. Date of last attack \_\_\_\_\_

c. No. of attacks within last year:

0  1

1-5  2

6-12  3

13-24  4

25-36  5

>36  6

d. No. of lifetime attacks:

1  1

2-4  2

5-9  3

10-49  4

50-100  5

>100  6

**3. Migraine triggers**

a. Are there factors that can trigger a migraine attack? Yes No NA  
 1  2  3

b. What type of migraine? MO MA MA+MO  
 1  2  3

3.1. Can these factors trigger a migraine attack:

Yes No

a. Physical activity  1  2

b. Light  1  2

c. Stress  1  2

d. Menstruation  1  2

e. Alcohol  1  2

f. Strong smells  1  2

g. Lack of/too much sleep  1  2

h. Other factors: \_\_\_\_\_

**4. Chronic migraine (MA+MO)**

During the past 3 successive months, have you had:

a. Headache at least 15 days a month Yes No  
 1  2

b. Migraine at least 8 days a month  1  2

**5. Tension-type headache**

Do you have tension-type headaches

|  |                            |                            |
|--|----------------------------|----------------------------|
|  | Yes                        | No                         |
|  | <input type="checkbox"/> 1 | <input type="checkbox"/> 2 |

**5.1 Headache characteristics**

|                                     |                            |                            |
|-------------------------------------|----------------------------|----------------------------|
|                                     | Yes                        | No                         |
| a. Bilateral                        | <input type="checkbox"/> 1 | <input type="checkbox"/> 2 |
| b. Pressing                         | <input type="checkbox"/> 1 | <input type="checkbox"/> 2 |
| c. Mild/moderate intensity          | <input type="checkbox"/> 1 | <input type="checkbox"/> 2 |
| d. Aggravation by physical activity | <input type="checkbox"/> 1 | <input type="checkbox"/> 2 |
| e. Nausea                           | <input type="checkbox"/> 1 | <input type="checkbox"/> 2 |
| f. Vomiting                         | <input type="checkbox"/> 1 | <input type="checkbox"/> 2 |
| g. Photophobia                      | <input type="checkbox"/> 1 | <input type="checkbox"/> 2 |
| h. Phonophobia                      | <input type="checkbox"/> 1 | <input type="checkbox"/> 2 |

**5.2 Duration of headache**

< ½ h  1  
 ½ - 4 h  2  
 5 h - 23 h  3  
 1 - 3 days  4  
 4 - 7 days  5  
 >7 days  6

**5.3 Tension-type headache over time**

a. Headache days within last year:

0  1  
 1-7  2  
 8-14  3  
 15-30  4  
 31-179  5  
 ≥180  6

b. No. of tension-type headache days during the three last months: \_\_\_\_\_ days

c. If ≥45 headache days, are the days evenly spaced out

|                            |                            |
|----------------------------|----------------------------|
| Yes                        | No                         |
| <input type="checkbox"/> 1 | <input type="checkbox"/> 2 |

**6. MIGRAINE TREATMENT (MA+ MO)****6.1 Treatment of migraine attacks**

|                                                                |                            |                            |                            |
|----------------------------------------------------------------|----------------------------|----------------------------|----------------------------|
|                                                                | Yes                        | No                         | NA                         |
| a. Triptans are efficient                                      | <input type="checkbox"/> 1 | <input type="checkbox"/> 2 | <input type="checkbox"/> 3 |
| b. Regular painkillers (NSAID, Paracetamol etc.) are efficient | <input type="checkbox"/> 1 | <input type="checkbox"/> 2 | <input type="checkbox"/> 3 |
| c. Ergotamine drugs are efficient                              | <input type="checkbox"/> 1 | <input type="checkbox"/> 2 | <input type="checkbox"/> 3 |
| d. Other drug(s) _____                                         |                            |                            |                            |

**6.2 Use of medication**

a. No. of days of triptan-use per month \_\_\_\_\_  
 b. No. of days of regular painkiller-use per month \_\_\_\_\_

**6.3 Prophylactic treatment of migraine**

|                                                |                            |                            |                            |
|------------------------------------------------|----------------------------|----------------------------|----------------------------|
|                                                | Yes                        | No                         | NA                         |
| a. Beta-blockers are efficient                 | <input type="checkbox"/> 1 | <input type="checkbox"/> 2 | <input type="checkbox"/> 3 |
| b. Ca <sup>2+</sup> -antagonists are efficient | <input type="checkbox"/> 1 | <input type="checkbox"/> 2 | <input type="checkbox"/> 3 |

c. Angiotensin II receptor blockers are efficient  1  2  3d. ACE-inhibitors are efficient  1  2  3e. Anti-epilepsy drugs are efficient  1  2  3f. Antidepressive medication (mirtazapine) is efficient  1  2  3g. Hormone treatment is efficient  1  2  3

h. Other drug(s) \_\_\_\_\_

g. Are you currently receiving prophylactic treatment(s) for migraine  1  2

**8. SECONDARY HEADACHES?** Yes  1 No  2

If yes, specify: \_\_\_\_\_

**11. Migraine within the family**

|                               |                            |                            |
|-------------------------------|----------------------------|----------------------------|
|                               | Yes                        | No                         |
| a. Mother has/had migraine    | <input type="checkbox"/> 1 | <input type="checkbox"/> 2 |
| b. Father has/had migraine    | <input type="checkbox"/> 1 | <input type="checkbox"/> 2 |
| d. Siblings have/had migraine | <input type="checkbox"/> 1 | <input type="checkbox"/> 2 |
| e. Children have/had migraine | <input type="checkbox"/> 1 | <input type="checkbox"/> 2 |

Interview conducted by: \_\_\_\_\_
