# Supplementary material for: Cohort profile: COpenhagen ROsacea COhort (COROCO) and COpenhagen MIgraine COhort (COMICO)
Source: PubMed Central journal article supplement — BMJ Open. 2020 Aug 20;10(8):e039445. doi: 10.1136/bmjopen-2020-039445 (PMC7440817; doi:10.1136/bmjopen-2020-039445), 2020-08-20
Supplement: bmjopen-2020-039445supp003.pdf [file bmjopen-2020-039445supp003.pdf]

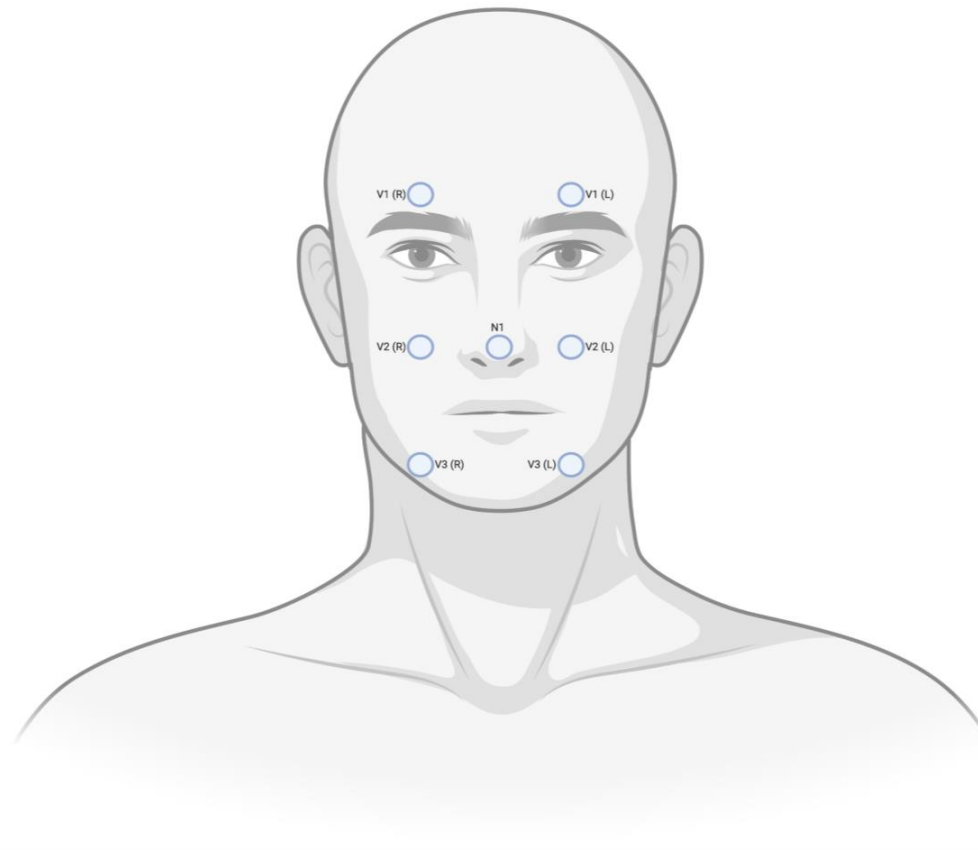

**Figure 1.** Reference for evaluating thermal pictures. Each side of the face will be evaluated at areas corresponding to the three branches of the trigeminal nerve (forehead, cheeks, chin) and on the tip of the nose. Measurements will be performed on small areas (circles) rather than single points, to obtain an average from each area. To ensure correct ratio, circles were adjusted to match the pupil and iris of each picture. V1, ophthalmic nerve; V2, maxillary nerve; V3, mandibular nerve; R, right; L, left. Created with BioRender.com.
